# Supplementary material for: Investigation of the Wilson gene ATP7B transcriptional start site and the effect of core promoter alterations
Source: Springer Nature journal article supplement (doi:10.1038/s41598-021-87000-9), 2021-04-07
Supplement: MOESM1 [file 41598_2021_87000_MOESM1_ESM.pdf]

# **SUPPLEMENTARY INFORMATION**

## **Investigation of the Wilson gene ATP7B transcriptional start site and the effect of core promoter alterations**

Clemens Höflich <sup>1</sup>, Angela Brieger <sup>1</sup>, Stefan Zeuzem <sup>1</sup>, Guido Plotz <sup>1</sup>

<sup>1</sup> Biomedical Research Laboratory, 1st Department of Internal Medicine, University Hospital  
Frankfurt, Germany

**Supplementary Table 1:****pGL4.10-ATP7B plasmid variants and primer sequences**

| pGL4.10-ATP7B vector/identifier |    | Genotype alterations in comparison to ATP7B reference sequence NG_008806:4024-5149 * | Site-directed primers used for generation                                                  |
|---------------------------------|----|--------------------------------------------------------------------------------------|--------------------------------------------------------------------------------------------|
| -54G>T                          | D1 | rs115564351                                                                          | 5' -CGACCAGTTGACCTTTTGCTCTGAGCCAGATCAGAGAA<br>5' -AAAGGTCAACTGGTCCGTGGAGGAGAGCGGGGT        |
| -36C>T                          | D2 | rs762339422                                                                          | 5' -GCTCTGAGTCAGATCAGAGAAGAATTCCGGTGTCCTG<br>5' -TGATCTGACTCAGAGCAAAAGGTCACCTGGTCCGGTG     |
| -32A>G                          | D3 | rs759260854                                                                          | 5' -CTGAGCCAGGTCAGAGAAGAATTCCGGTGTCCTG<br>5' -TGACCTGGCTCAGAGCAAAAGGTCACCTGGTCCG           |
| REFERENCE SEQUENCE              | RR | None                                                                                 | Both primer pairs from RP and PR                                                           |
| Polymorphism -75 rs2277448      | RP | rs2277448                                                                            | 5' -AGAGCCGAGCCGCGCCGATGCCCTCACACTCTGCGCCTC<br>5' -GAGGCGCAGAGTGTGAGGGCATCGGCGCGGCTCGGCTCT |
| Polymorphism -123 rs148013251   | PR | rs148013251                                                                          | 5' -CTCCCGGACTTTAACACCCCGCTCTCCTCCACCGAC<br>5' -GTCGGTGGAGGAGAGCGGGGTGTTAAAGTCCCGGAG       |
| Both polymorphisms              | PP | rs148013251<br>rs2277448                                                             | originally cloned ATP7B sequence                                                           |

\* All preparations also contained rs1427836170, a single-nucleotide exchange far from the ATP7B translational start (-842 bp), but close to the ALG11 translational start codon. This alteration was tested not to influence luciferase reporter expression from the ATP7B promoter (data not shown).

**Supplementary Table 2:****qPCR probe context sequences**

| <b>qPCR assay</b> | <b>Context sequence (provided by manufacturer)</b> |
|-------------------|----------------------------------------------------|
| ATP7B-exon 4-5    | CATTGAGCTGACAATCACAGGGATG                          |
| ATP7B-70          | GGACTTTAACACCCCGCTCTCCTCC                          |
| ATP7B-130         | TCCCGGACCCCTGTTTGCTTTAGAG                          |
| ATP7B-300         | GCCACCTGGGGAGTGGGCGAGGGTC                          |
| ATP7B-550         | CCGCAGGCGGTGGGTGAGCCCTGGG                          |

**Supplementary Table 3:****Genotype of the two ATP7B promoter polymorphisms in ancient and present genomes.**

| Sample      | Identifier | Origin                        | Age          | rs148013251           | rs2277448           | Coupled/<br>Uncoupled?* |
|-------------|------------|-------------------------------|--------------|-----------------------|---------------------|-------------------------|
| Altai       |            | <i>Neandertal</i> , Sibiria   | 90.000 years | Ref. seq.             | Ref. seq.           | n.a.                    |
| Chagyrskaya |            | <i>Neandertal</i> , Sibiria   | 60.000 years | Ref. seq.             | Ref. seq.           | n.a.                    |
| Vindija     |            | <i>Neandertal</i> , Croatia   | 30.000 years | Ref. seq.             | Ref. seq.           | n.a.                    |
| Denisova    |            | <i>Denisovan</i> , Sibiria    | 40.000 years | Ref. seq.             | Ref. seq.           | n.a.                    |
| Ust-Ishim   | PRJEB6622  | <i>Homo sapiens</i> , Sibiria | 45.000 years | Ref. seq./rs148013251 | rs2277448           | n.a.                    |
| San         | SS6004473  | Africa                        | Present day  | Ref. seq.             | Ref. seq.           | n.a.                    |
| Dinka       | SS6004480  | Africa                        | Present day  | Ref. seq.             | Ref. seq.           | n.a.                    |
| Mandeka     | SS6004470  | Africa                        | Present day  | Ref. seq.             | Ref. seq.           | n.a.                    |
| Mbuti       | SS6004471  | Africa                        | Present day  | Ref. seq.             | Ref. seq.           | n.a.                    |
| Yoruba      | SS6004475  | Africa                        | Present day  | Ref. seq./rs148013251 | Ref. seq./rs2277448 | 4/0                     |
| French      | SS6004468  | Europe                        | Present day  | Ref. seq./rs148013251 | rs2277448           | n.a.                    |
| Sardinia    | SS6004474  | Europe                        | Present day  | Ref. seq./rs148013251 | Ref. seq./rs2277448 | 6/0                     |
| Dai         | SS6004467  | East/Southern Asia            | Present day  | Ref. seq./rs148013251 | rs2277448           | n.a.                    |
| Han         | SS6004469  | Asia                          | Present day  | Ref. seq./rs148013251 | rs2277448           | n.a.                    |
| Papua       | SS6004472  | Asia                          | Present day  | Ref. seq.             | Ref. seq.           | n.a.                    |
| Australia   | SS6004477  | Oceania                       | Present day  | Ref. seq./rs148013251 | Ref. seq./rs2277448 | 1/0                     |
| Australia   | SS6004478  | Oceania                       | Present day  | Ref. seq./rs148013251 | Ref. seq./rs2277448 | 3/0                     |
| America     | SS6004479  | America Mixe                  | Present day  | Ref. seq./rs148013251 | Ref. seq./rs2277448 | 4/0                     |
| Karitiana   | SS6004476  | South America indigenous      | Present day  | Ref. seq./rs148013251 | Ref. seq./rs2277448 | 4/0                     |

\* Sequences in which rs148013251 occurs together with rs2277448 (coupled)/sequences in which rs148013251 occurs with reference sequence in the position of rs2277448

**Supplementary Table 4:****Results of the ElemeNT analysis of the core promoter**

Retrieved in December 2020 from:

<http://lifefaculty.biu.ac.il/gershon-tamar/index.php/element-description/elementv2>

Input sequence:

```
ggtcccaaatgaagggcggttcccggaccctgtttgctttagagccga
gccgcccgatgcctcacactctgcgctcctctcccggactttaaca
ccccgctctcctccaccgaccaggtgaccttttgctctgagccagatcag
agaagaattcgggtgctcgt
```

RESULTS:

No combinations of core promoter elements were detected in the input sequence.

**Elements found:**

| Element Start       | position | Sequence | PWM score | Consensus Match |
|---------------------|----------|----------|-----------|-----------------|
| BRE upstream        | 52       | ccgcgcc  | 0.7334    | 7 out of 7      |
| BRE upstream        | 47       | ccgagcc  | 0.2043    | 6 out of 7      |
| Mammalian Initiator | 142      | ccagatc  | 0.4262    | 7 out of 7      |
| Mammalian Initiator | 66       | tcacact  | 0.2182    | 7 out of 7      |
| Mammalian Initiator | 5        | ccaaatg  | 0.0739    | 6 out of 7      |
| Mammalian Initiator | 103      | ccgctct  | 0.0667    | 6 out of 7      |
| Mammalian Initiator | 68       | acactct  | 0.0600    | 6 out of 7      |
| Mammalian Initiator | 24       | ccggacc  | 0.0474    | 6 out of 7      |
| Mammalian Initiator | 120      | ccaggtg  | 0.0341    | 5 out of 7      |
| Mammalian Initiator | 96       | taacacc  | 0.0260    | 6 out of 7      |
| Mammalian Initiator | 41       | ttagagc  | 0.0244    | 6 out of 7      |
| Mammalian Initiator | 57       | ccgatgc  | 0.0226    | 5 out of 7      |
| Mammalian Initiator | 52       | ccgcgcc  | 0.0202    | 5 out of 7      |
| Mammalian Initiator | 98       | acacccc  | 0.0182    | 5 out of 7      |
| Mammalian Initiator | 147      | tcagaga  | 0.0170    | 5 out of 7      |
| Mammalian Initiator | 47       | ccgagcc  | 0.0164    | 5 out of 7      |
| Mammalian Initiator | 132      | ttgctct  | 0.0152    | 6 out of 7      |
| Mammalian Initiator | 36       | ttgcttt  | 0.0152    | 6 out of 7      |
| Mammalian Initiator | 159      | tcgggtg  | 0.0125    | 5 out of 7      |
| Mammalian Initiator | 17       | gcgggtc  | 0.0104    | 5 out of 7      |

There are many factors affecting transcription.

Please note that the putative motifs are only based on DNA sequence match.

**Supplementary Figure 1: qPCR probe calibration**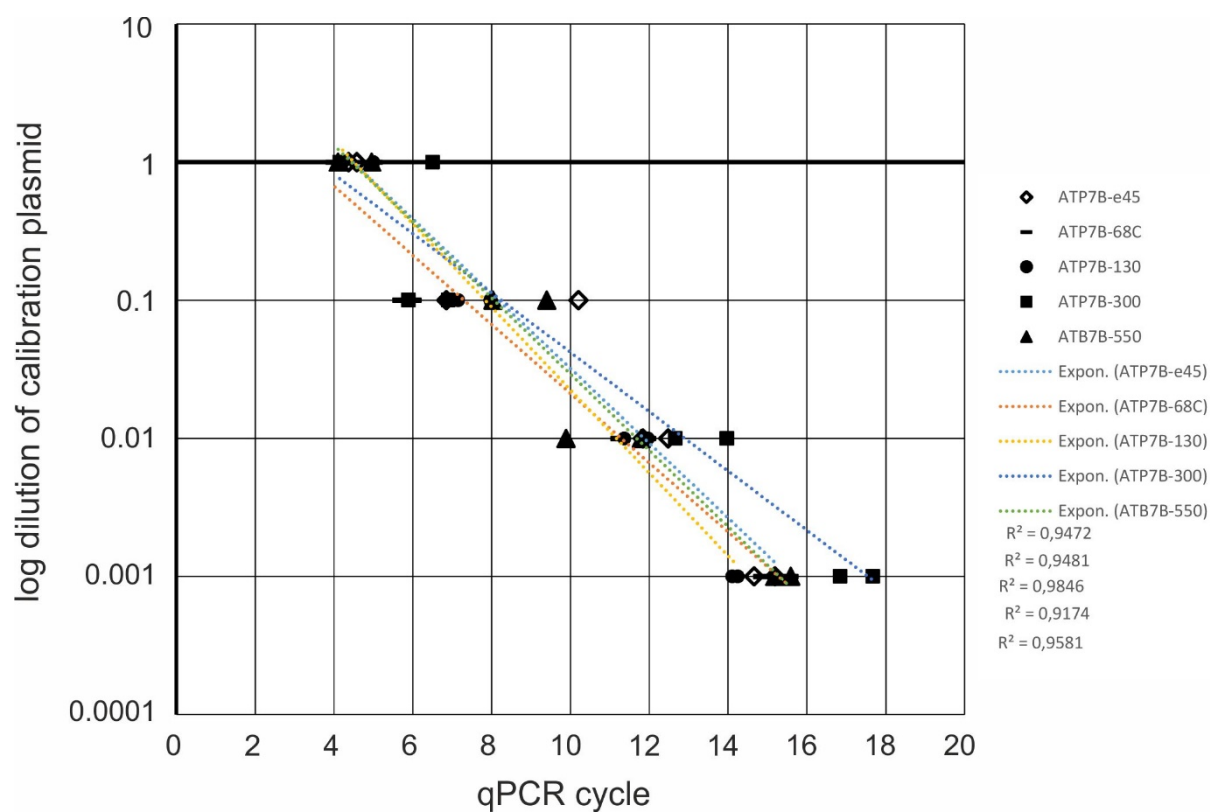

qPCR reactions were performed as detailed in Materials and Methods using dilutions of the calibration plasmid shown in **Figure 1C**. Ct values of the individual probes are shown. Linear regression lines were calculated using excel. Correlation coefficients are given.

**Supplementary Figure 2: Frequency of the two promoter polymorphisms**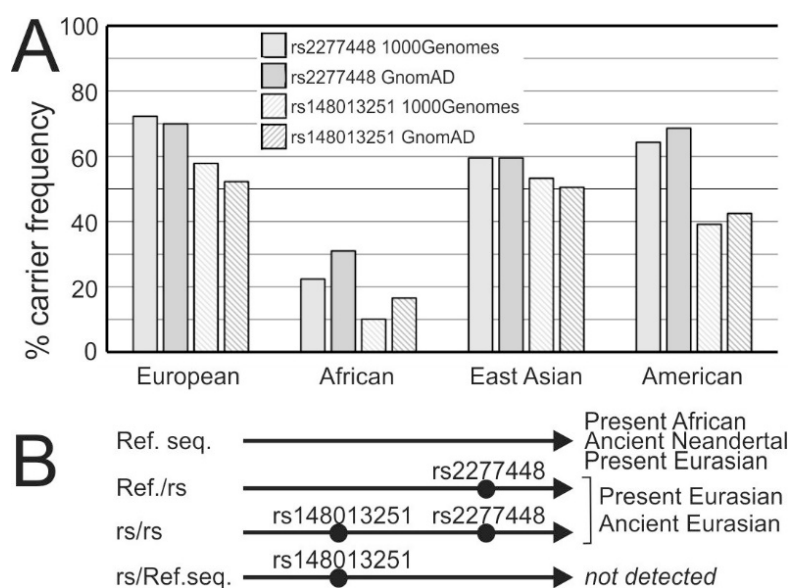

A. Data on carrier frequencies were retrieved in september 2020 from the assemblies of the NCBI dbSNP database.

B. The diagram demonstrates which combinations of rs148013251 and rs2277448 have been detected in ancient and present genomes of individuals of different geographical origin and is a graphical representation of the information in Supplementary Table 3. Ref.seq. or Ref. means reference sequence, rs means “reference SNP”.

**Supplementary Figure 3: Linearity of luciferase assay measurements**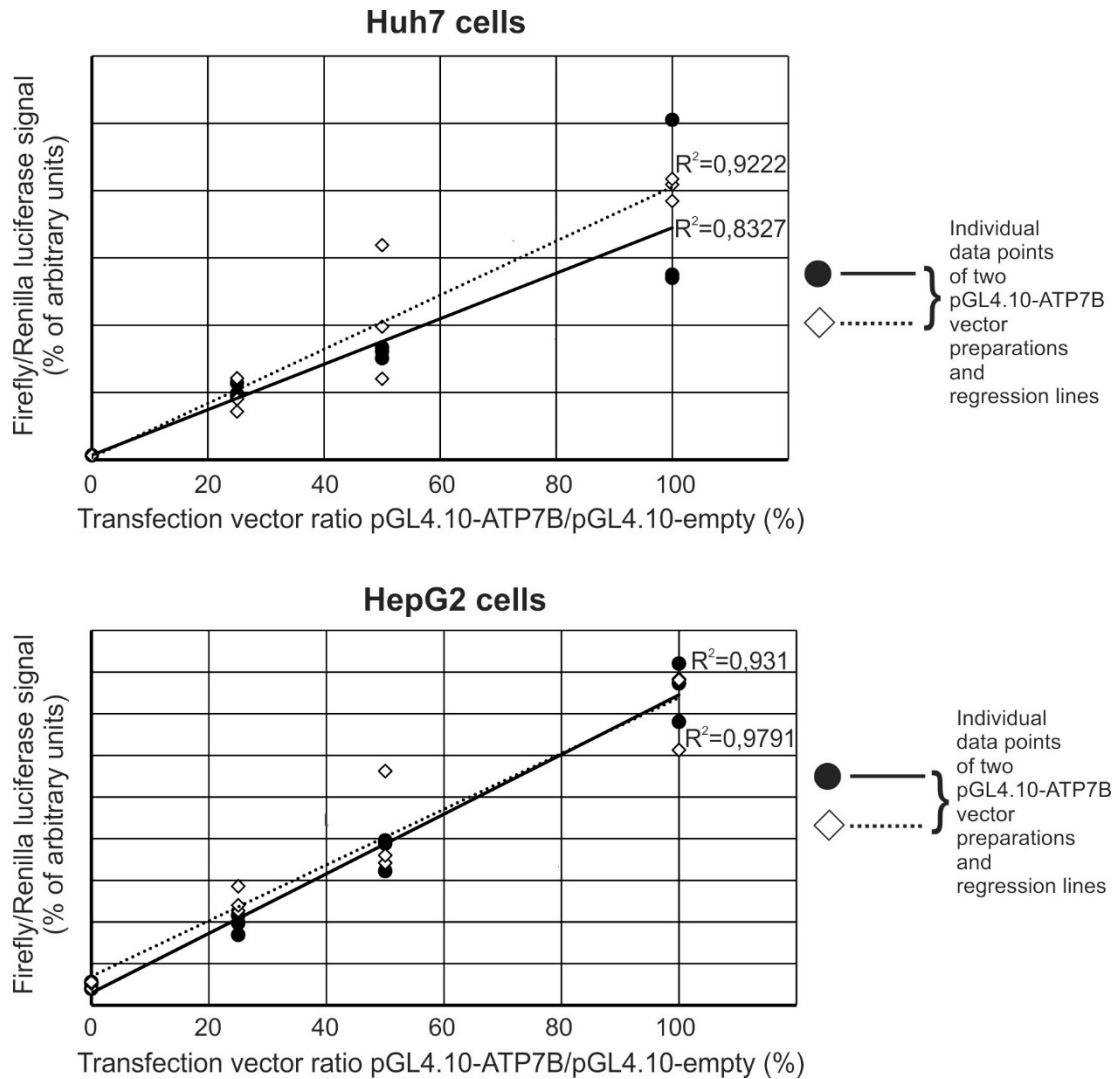

Huh7 or HepG2 seeded to 24.000 cells/well in 96-wells were co-transfected with 50 ng pGL4.74 (renilla control) and 50/25/12.5 ng pGL4.10-promoter vector (firefly probe) (100/50/25%), supplemented by 0/25/37.5 ng pGL4.10 vector (empty) to achieve 100 ng total plasmid DNA per well. All experiments were performed in triplicate. For control of transfection efficiency, a cotransfection of 50 ng pGL4.74 with 50 ng pcDNA3-EGFP performed in parallel. After 48 hours, transfection efficiency was about 40% as determined by fluorescence microscopy. Luciferase activities were measured as detailed in Materials and Methods. Regression lines and coefficient of determination  $R^2$  are given.
